# Supplementary material for: The difference in the CO2adsorption capacities of different functionalized pillar-layered metal–organic frameworks (MOFs)
Source: Royal Society of Chemistry journal article supplement (doi:10.1039/d1dt00498k), 2021-01-01
Supplement: d1dt00498k1.pdf [file d1dt00498k1.pdf]

Electronic Supplementary Information for

## The difference in CO<sub>2</sub> adsorption capacities of different functionalized pillar-layered metal-organic frameworks (MOFs)

Xiang-Jing Gao, and He-Gen Zheng \*

State Key Laboratory of Coordination Chemistry, School of Chemistry and Chemical Engineering, Collaborative Innovation Center of Advanced Microstructures, Nanjing University, Nanjing 210023, P. R. China. Tel: +86-25-89682309; E-mail: [zhenghg@nju.edu.cn](mailto:zhenghg@nju.edu.cn).

### Section S1. The synthesis of the ligands

#### The name and the corresponding abbreviations of the ligands.

H<sub>4</sub>L: 5',5'''-oxybis([1,1':3',1''-terphenyl]-4,4''-dicarboxylic acid);  
DPB: 1,4-di(pyridin-4-yl)benzene; 2-FDPB: 4,4'-(2-fluoro-1,4-phenylene)dipyridine;  
2,3-FDPB: 4,4'-(2,3-difluoro-1,4-phenylene)dipyridine; 2,5-FDPB: 4,4'-(2,5-difluoro-1,4-phenylene)dipyridine;  
2-NDPB: 4,2':5',4''-terpyridine; 2,3-NDPB: 3,6-di(pyridin-4-yl)pyridazine;  
2,5-NDPB: 2,5-di(pyridin-4-yl)pyrazine; 2-NH<sub>2</sub>DPB: 2,5-di(pyridin-4-yl)aniline.

#### The synthesis of the auxiliary N-based ligands

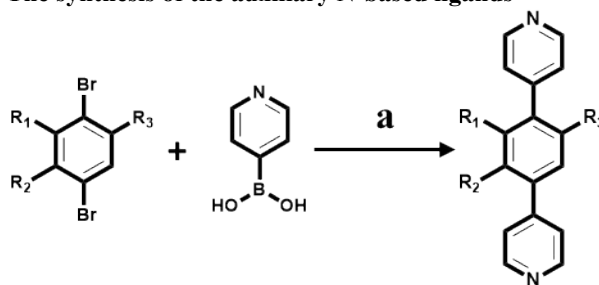

**Scheme S1.** Synthetic procedure for the auxiliary N-based ligands: DPB, R<sub>1</sub> = R<sub>2</sub> = R<sub>3</sub> = H; 2-FDPB, R<sub>1</sub> = F, R<sub>2</sub> = R<sub>3</sub> = H; 2,3-FDPB, R<sub>1</sub> = R<sub>2</sub> = F, R<sub>3</sub> = H; 2,5-FDPB, R<sub>1</sub> = H, R<sub>2</sub> = R<sub>3</sub> = F; 2-NH<sub>2</sub>DPB, R<sub>1</sub> = NH<sub>2</sub>, R<sub>2</sub> = R<sub>3</sub> = H. Reagents and conditions: a) K<sub>2</sub>CO<sub>3</sub>, Pd[P(Ph)<sub>3</sub>]<sub>4</sub> (tetrakis(triphenylphosphine)palladium), 1,4-dioxane, H<sub>2</sub>O, N<sub>2</sub> atmosphere, 95°C.

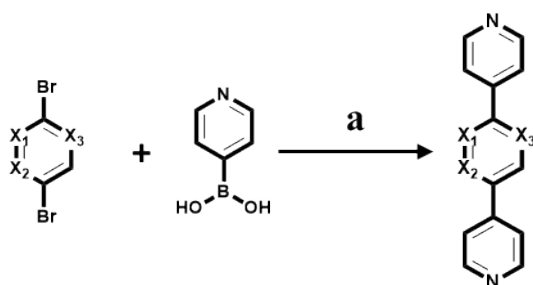

**Scheme S2.** Synthetic procedure for the auxiliary N-based ligands: 2-NDPB, X<sub>1</sub> = N, X<sub>2</sub> = X<sub>3</sub> = CH; 2,3-NDPB, X<sub>1</sub> = X<sub>2</sub> = N, X<sub>3</sub> = CH; 2,5-NDPB, X<sub>1</sub> = CH, X<sub>2</sub> = X<sub>3</sub> = N. Reagents and conditions: a) K<sub>3</sub>PO<sub>4</sub>, Pd<sub>2</sub>(dba)<sub>3</sub>, tricyclohexylphosphonium tetrafluoroborate, 1,4-dioxane, H<sub>2</sub>O, N<sub>2</sub> atmosphere, 90°C.

### The synthesis of the H<sub>4</sub>L

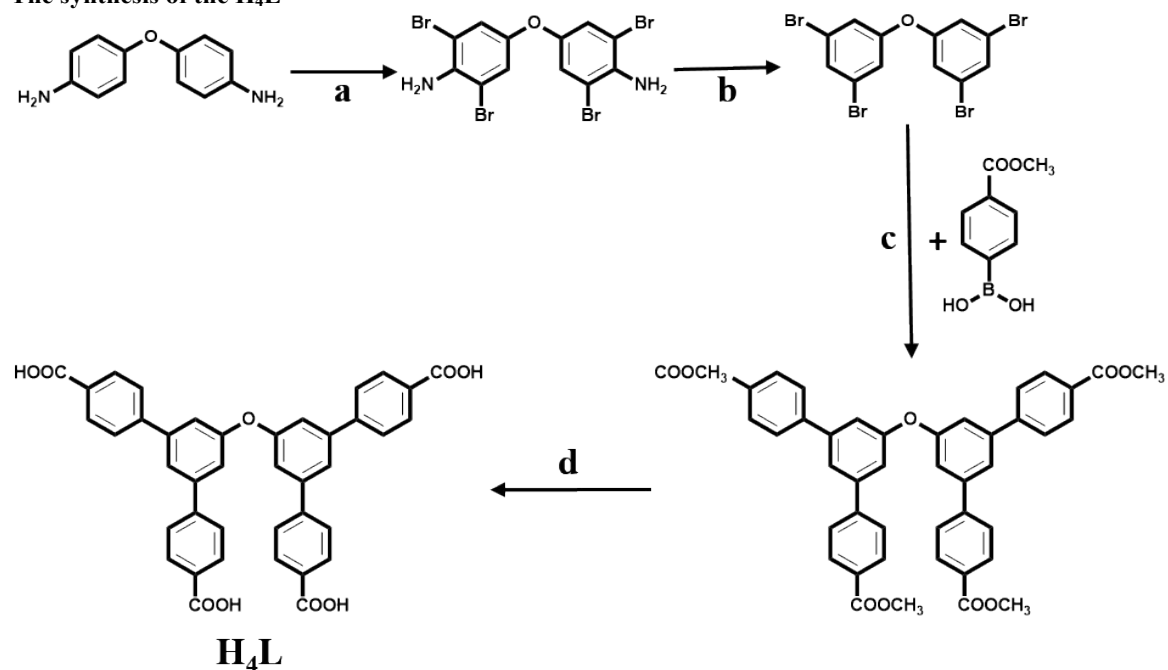

**Scheme S3.** Synthetic procedure for H<sub>4</sub>L. Reagents and conditions: a) Br<sub>2</sub>, CH<sub>3</sub>COOH, 30°C; b) NaNO<sub>2</sub>, H<sub>2</sub>SO<sub>4</sub> (25% in H<sub>2</sub>O), ethyl acetate, 55°C; c) KF·2H<sub>2</sub>O, Pd<sub>2</sub>(dba)<sub>3</sub> (tris(dibenzylideneacetonyl)bis-palladium), P(o-tolyl)<sub>3</sub> tris(2-methylphenyl)phosphine, tetrahydrofuran, N<sub>2</sub> atmosphere, 55°C; d) THF/H<sub>2</sub>O/CH<sub>3</sub>OH, NaOH, reflux, HCl.

## Section S2. The crystallographic data of compounds 1 – 8

**Table S1** Crystal data and the structure refinement parameters for compound 1 – 4

| Compound                                        | 1 <sup>a</sup>                                                   | 2 <sup>a</sup>                                                                  | 3 <sup>a</sup>                                                                  | 4 <sup>a</sup>                                                                  |
|-------------------------------------------------|------------------------------------------------------------------|---------------------------------------------------------------------------------|---------------------------------------------------------------------------------|---------------------------------------------------------------------------------|
| Empirical formula                               | C <sub>72</sub> H <sub>46</sub> Co <sub>2</sub> N <sub>4</sub> O | C <sub>72</sub> H <sub>44</sub> Co <sub>2</sub> F <sub>2</sub> N <sub>4</sub> O | C <sub>72</sub> H <sub>42</sub> Co <sub>2</sub> F <sub>4</sub> N <sub>4</sub> O | C <sub>72</sub> H <sub>42</sub> Co <sub>2</sub> F <sub>4</sub> N <sub>4</sub> O |
| Formula weight                                  | 9                                                                | 9                                                                               | 9                                                                               | 9                                                                               |
| Temperature(K)                                  | 1228.99                                                          | 1264.97                                                                         | 1300.95                                                                         | 1300.95                                                                         |
| Radiation                                       | 193                                                              | 193                                                                             | 193                                                                             | 193                                                                             |
| Wavelength(Å)                                   | Ga Kα                                                            | Ga Kα                                                                           | Ga Kα                                                                           | Ga Kα                                                                           |
| Crystal system                                  | 1.34139                                                          | 1.34139                                                                         | 1.34139                                                                         | 1.34139                                                                         |
| Space group                                     | triclinic                                                        | triclinic                                                                       | triclinic                                                                       | triclinic                                                                       |
| <i>a</i> (Å)                                    | <i>P</i> $\bar{1}$                                               | <i>P</i> $\bar{1}$                                                              | <i>P</i> $\bar{1}$                                                              | <i>P</i> $\bar{1}$                                                              |
| <i>b</i> (Å)                                    | 15.6949(7)                                                       | 15.6982(12)                                                                     | 15.6937(13)                                                                     | 15.7015(12)                                                                     |
| <i>c</i> (Å)                                    | 16.2787(7)                                                       | 16.1863(12)                                                                     | 16.1670(13)                                                                     | 16.0590(12)                                                                     |
| $\alpha$ (°)                                    | 17.4503(8)                                                       | 17.4056(13)                                                                     | 17.3817(15)                                                                     | 17.3895(11)                                                                     |
| $\beta$ (°)                                     | 78.711(2)                                                        | 78.553(3)                                                                       | 78.765(4)                                                                       | 78.572(6)                                                                       |
| $\gamma$ (°)                                    | 80.290(2)                                                        | 85.240(3)                                                                       | 81.283(4)                                                                       | 84.677(7)                                                                       |
| <i>V</i> (Å <sup>3</sup> )                      | 72.523(3)                                                        | 83.272(3)                                                                       | 82.367(4)                                                                       | 83.611(5)                                                                       |
| <i>Z</i>                                        | 4141.5(3)                                                        | 4296.8(6)                                                                       | 4251.3(6)                                                                       | 4259.9(5)                                                                       |
| <i>D</i> <sub>calcd</sub> (g·cm <sup>-3</sup> ) | 2                                                                | 2                                                                               | 2                                                                               | 2                                                                               |
| $\mu$ (mm <sup>-1</sup> )                       | 0.986                                                            | 0.978                                                                           | 1.016                                                                           | 1.014                                                                           |
| <i>F</i> (000)                                  | 2.408                                                            | 2.382                                                                           | 2.405                                                                           | 2.400                                                                           |
| $\theta$ range (deg)                            | 1264.0                                                           | 1296.0                                                                          | 1328.0                                                                          | 1328.0                                                                          |
| Index ranges                                    | 2.506 – 54.165                                                   | 2.436 – 56.230                                                                  | 2.274 – 54.211                                                                  | 2.453 – 53.928                                                                  |
| <i>hkl</i>                                      | - 18 ≤ <i>h</i> ≤ 18                                             | - 19 ≤ <i>h</i> ≤ 19                                                            | - 18 ≤ <i>h</i> ≤ 18                                                            | - 18 ≤ <i>h</i> ≤ 18                                                            |
| Reflections collected/unique                    | - 19 ≤ <i>k</i> ≤ 19                                             | - 20 ≤ <i>k</i> ≤ 20                                                            | - 19 ≤ <i>k</i> ≤ 16                                                            | - 19 ≤ <i>k</i> ≤ 19                                                            |
| Data/ restraints/ parameters                    | - 21 ≤ <i>l</i> ≤ 21                                             | - 21 ≤ <i>l</i> ≤ 21                                                            | - 21 ≤ <i>l</i> ≤ 20                                                            | - 20 ≤ <i>l</i> ≤ 18                                                            |
| GOF on <i>F</i> <sup>2</sup>                    | 58909/15185                                                      | 80637/17038                                                                     | 46256/15614                                                                     | 55345/15562                                                                     |
| Final <i>R</i> indices                          | 15185/0/784                                                      | 17038/12/1153                                                                   | 15614/57/1138                                                                   | 15562/0/1165                                                                    |
| [ <i>I</i> > 2σ( <i>I</i> )]                    | 1.042                                                            | 1.023                                                                           | 1.006                                                                           | 1.074                                                                           |
| <i>R</i> indices                                | <i>R</i> <sub>1</sub> <sup>b</sup> = 0.0728                      | <i>R</i> <sub>1</sub> <sup>b</sup> = 0.0755                                     | <i>R</i> <sub>1</sub> <sup>b</sup> = 0.1312                                     | <i>R</i> <sub>1</sub> <sup>b</sup> = 0.0535                                     |
| (all data)                                      | <i>wR</i> <sub>2</sub> <sup>c</sup> = 0.2005                     | <i>wR</i> <sub>2</sub> <sup>c</sup> = 0.2349                                    | <i>wR</i> <sub>2</sub> <sup>c</sup> = 0.3543                                    | <i>wR</i> <sub>2</sub> <sup>c</sup> = 0.1746                                    |
| Largest diff. Peak and hole                     | <i>R</i> <sub>1</sub> <sup>b</sup> = 0.0870                      | <i>R</i> <sub>1</sub> <sup>b</sup> = 0.0917                                     | <i>R</i> <sub>1</sub> <sup>b</sup> = 0.1926                                     | <i>R</i> <sub>1</sub> <sup>b</sup> = 0.0621                                     |
| (e <sup>-</sup> ·Å <sup>-3</sup> )              | <i>wR</i> <sub>2</sub> <sup>c</sup> = 0.2133                     | <i>wR</i> <sub>2</sub> <sup>c</sup> = 0.2486                                    | <i>wR</i> <sub>2</sub> <sup>c</sup> = 0.3962                                    | <i>wR</i> <sub>2</sub> <sup>c</sup> = 0.1824                                    |
|                                                 | 2.52 and -0.77                                                   | 1.21 and -0.43                                                                  | 1.28 and -0.56                                                                  | 1.36 and -0.51                                                                  |

<sup>a</sup>The lattice solvent molecules are squeezed by PLATON program. <sup>b</sup> $R_1 = \frac{\sum ||F_o| - |F_c||}{\sum |F_o|}$ . <sup>c</sup> $wR_2 = \frac{\{\sum [w(F_o^2 - F_c^2)^2] / \sum [w(F_o^2)^2]\}^{1/2}}$ ; where  $w = 1 / [\sigma^2(F_o^2) + (aP)^2 + bP]$ ,  $P = (F_o^2 + 2F_c^2) / 3$ .

**Table S2** Crystal data and the structure refinement parameters for compound **5 – 8**

| Compound                                                          | <b>5<sup>a</sup></b>                                            | <b>6<sup>a</sup></b>                                             | <b>7<sup>a</sup></b>                                             | <b>8<sup>a</sup></b>                                             |
|-------------------------------------------------------------------|-----------------------------------------------------------------|------------------------------------------------------------------|------------------------------------------------------------------|------------------------------------------------------------------|
| Empirical formula                                                 | C <sub>70</sub> H <sub>4</sub> Co <sub>2</sub> N <sub>6</sub> O | C <sub>68</sub> H <sub>42</sub> Co <sub>2</sub> N <sub>8</sub> O | C <sub>68</sub> H <sub>42</sub> Co <sub>2</sub> N <sub>8</sub> O | C <sub>72</sub> H <sub>48</sub> Co <sub>2</sub> N <sub>6</sub> O |
| Formula weight                                                    | 1230.97                                                         | 1232.95                                                          | 1232.95                                                          | 1259.02                                                          |
| Temperature(K)                                                    | 193                                                             | 193                                                              | 193                                                              | 193                                                              |
| Radiation                                                         | Ga K $\alpha$                                                   | Ga K $\alpha$                                                    | Ga K $\alpha$                                                    | Ga K $\alpha$                                                    |
| Wavelength( $\text{\AA}$ )                                        | 1.34139                                                         | 1.34139                                                          | 1.34139                                                          | 1.34139                                                          |
| Crystal system                                                    | triclinic                                                       | triclinic                                                        | triclinic                                                        | triclinic                                                        |
| Space group                                                       | <i>P</i> $\bar{1}$                                              | <i>P</i> $\bar{1}$                                               | <i>P</i> $\bar{1}$                                               | <i>P</i> $\bar{1}$                                               |
| <i>a</i> ( $\text{\AA}$ )                                         | 15.6045(5)                                                      | 15.479(2)                                                        | 15.5470(5)                                                       | 15.6660(6)                                                       |
| <i>b</i> ( $\text{\AA}$ )                                         | 16.0443(5)                                                      | 16.172(3)                                                        | 16.0134(5)                                                       | 16.2798(7)                                                       |
| <i>c</i> ( $\text{\AA}$ )                                         | 17.3893(5)                                                      | 17.414(3)                                                        | 17.4005(6)                                                       | 17.3799(7)                                                       |
| $\alpha$ ( $^\circ$ )                                             | 78.7890(10)                                                     | 78.489(13)                                                       | 78.694(2)                                                        | 78.3560(10)                                                      |
| $\beta$ ( $^\circ$ )                                              | 80.4680(10)                                                     | 84.732(11)                                                       | 81.9740(10)                                                      | 87.5780(10)                                                      |
| $\gamma$ ( $^\circ$ )                                             | 80.0540(10)                                                     | 82.848(12)                                                       | 79.5270(10)                                                      | 86.226(2)                                                        |
| <i>V</i> ( $\text{\AA}^3$ )                                       | 4166.9(2)                                                       | 4228.2(12)                                                       | 4152.8(2)                                                        | 4330.0(3)                                                        |
| <i>Z</i>                                                          | 2                                                               | 2                                                                | 2                                                                | 2                                                                |
| <i>D</i> <sub>calcd</sub> (g·cm <sup>-3</sup> )                   | 0.981                                                           | 0.968                                                            | 0.986                                                            | 0.966                                                            |
| $\mu$ (mm <sup>-1</sup> )                                         | 2.398                                                           | 2.368                                                            | 2.411                                                            | 2.313                                                            |
| <i>F</i> (000)                                                    | 1264.0                                                          | 1264.0                                                           | 1264.0                                                           | 1296.0                                                           |
| $\theta$ range (deg)                                              | 2.469 –<br>53.880                                               | 2.440 – 53.979                                                   | 2.480 – 53.969                                                   | 2.415 – 53.883                                                   |
| Index ranges                                                      | - 18 $\leq h \leq$ 18                                           | - 18 $\leq h \leq$ 18                                            | - 18 $\leq h \leq$ 16                                            | - 18 $\leq h \leq$ 18                                            |
| <i>hkl</i>                                                        | - 19 $\leq k \leq$ 19                                           | - 19 $\leq k \leq$ 19                                            | - 19 $\leq k \leq$ 19                                            | - 19 $\leq k \leq$ 19                                            |
|                                                                   | - 20 $\leq l \leq$ 20                                           | - 20 $\leq l \leq$ 20                                            | - 20 $\leq l \leq$ 20                                            | - 20 $\leq l \leq$ 18                                            |
| Reflections collected/unique                                      | 54200/15131                                                     | 61919/15457                                                      | 50567/15157                                                      | 56757/15701                                                      |
| Data/ restraints/ parameters                                      | 15131/0/784                                                     | 15457/6/1252                                                     | 15157/0/784                                                      | 15701/36/1159                                                    |
| GOF on <i>F</i> <sup>2</sup>                                      | 1.046                                                           | 1.033                                                            | 1.032                                                            | 1.042                                                            |
| Final <i>R</i> indices                                            | <i>R</i> <sub>1</sub> <sup>b</sup> = 0.0457                     | <i>R</i> <sub>1</sub> <sup>b</sup> = 0.0769                      | <i>R</i> <sub>1</sub> <sup>b</sup> = 0.0431                      | <i>R</i> <sub>1</sub> <sup>b</sup> = 0.0654                      |
| [ <i>I</i> > 2 $\sigma$ ( <i>I</i> )]                             | <i>wR</i> <sub>2</sub> <sup>c</sup> = 0.1262                    | <i>wR</i> <sub>2</sub> <sup>c</sup> = 0.2318                     | <i>wR</i> <sub>2</sub> <sup>c</sup> = 0.1140                     | <i>wR</i> <sub>2</sub> <sup>c</sup> = 0.2069                     |
| <i>R</i> indices                                                  | <i>R</i> <sub>1</sub> <sup>b</sup> = 0.0567                     | <i>R</i> <sub>1</sub> <sup>b</sup> = 0.0911                      | <i>R</i> <sub>1</sub> <sup>b</sup> = 0.0542                      | <i>R</i> <sub>1</sub> <sup>b</sup> = 0.0781                      |
| (all data)                                                        | <i>wR</i> <sub>2</sub> <sup>c</sup> = 0.1320                    | <i>wR</i> <sub>2</sub> <sup>c</sup> = 0.2457                     | <i>wR</i> <sub>2</sub> <sup>c</sup> = 0.1192                     | <i>wR</i> <sub>2</sub> <sup>c</sup> = 0.2185                     |
| Largest diff. Peak and hole (e <sup>-</sup> · $\text{\AA}^{-3}$ ) | 0.93 and -0.39                                                  | 1.48 and -0.43                                                   | 0.44 and -0.35                                                   | 0.77 and -0.46                                                   |

<sup>a</sup>The lattice solvent molecules are squeezed by PLATON program. <sup>b</sup>*R*<sub>1</sub> =  $\Sigma||F_o| - |F_c|| / \Sigma|F_o|$ . <sup>c</sup>*wR*<sub>2</sub> =  $\{\Sigma[w(F_o^2 - F_c^2)^2] / \Sigma[w(F_o^2)^2]\}^{1/2}$ ; where  $w = 1 / [\sigma^2(F_o^2) + (aP)^2 + bP]$ ,  $P = (F_o^2 + 2F_c^2) / 3$ .

Section S3. The characterization of compounds 1 – 8.

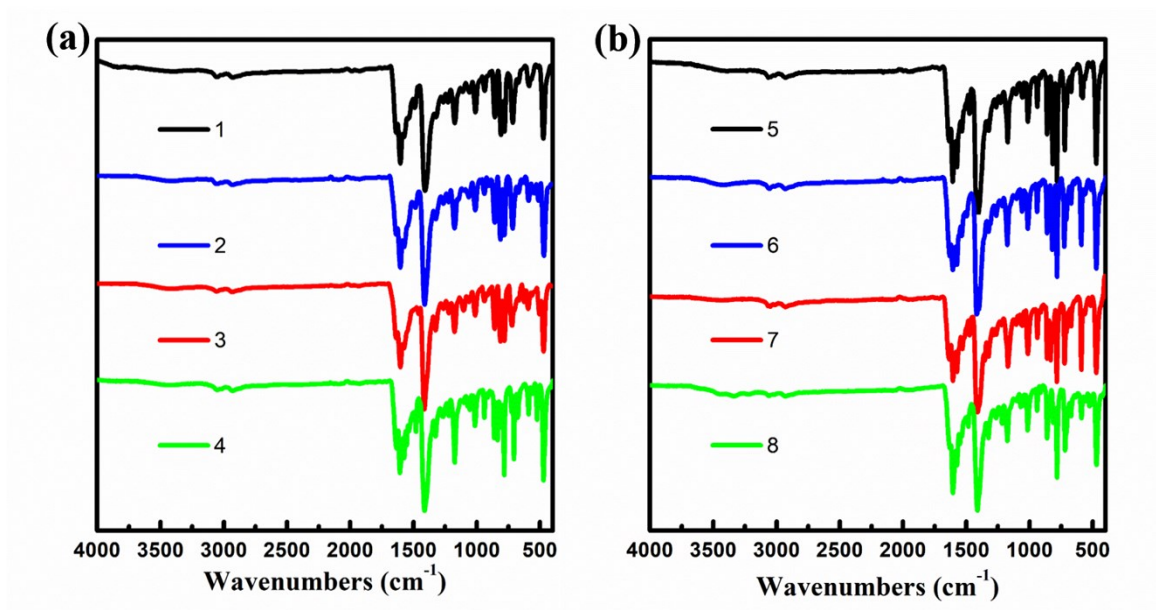

Figure S1. The IR spectra of compounds 1 – 4 (a), compounds 5 – 8 (b).

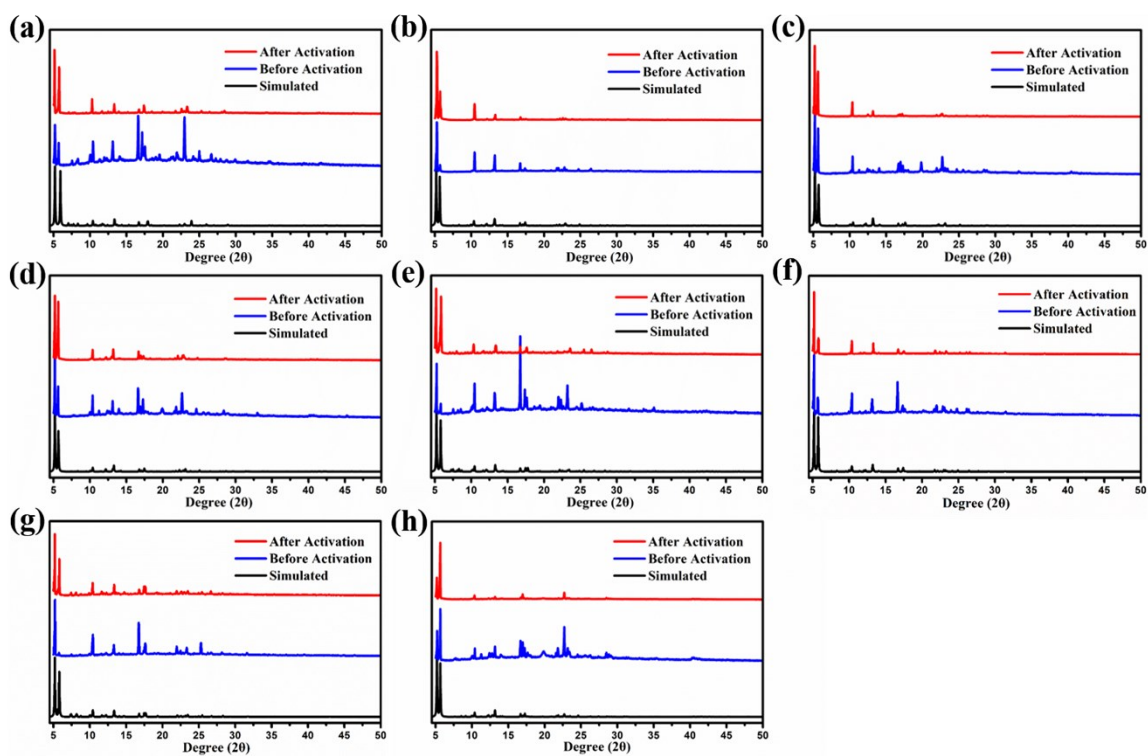

Figure S2. The PXRD patterns of compounds 1 (a), 2 (b), 3 (c), 4 (d), 5 (e), 6 (f), 7 (g), and 8 (h) before and after activation.

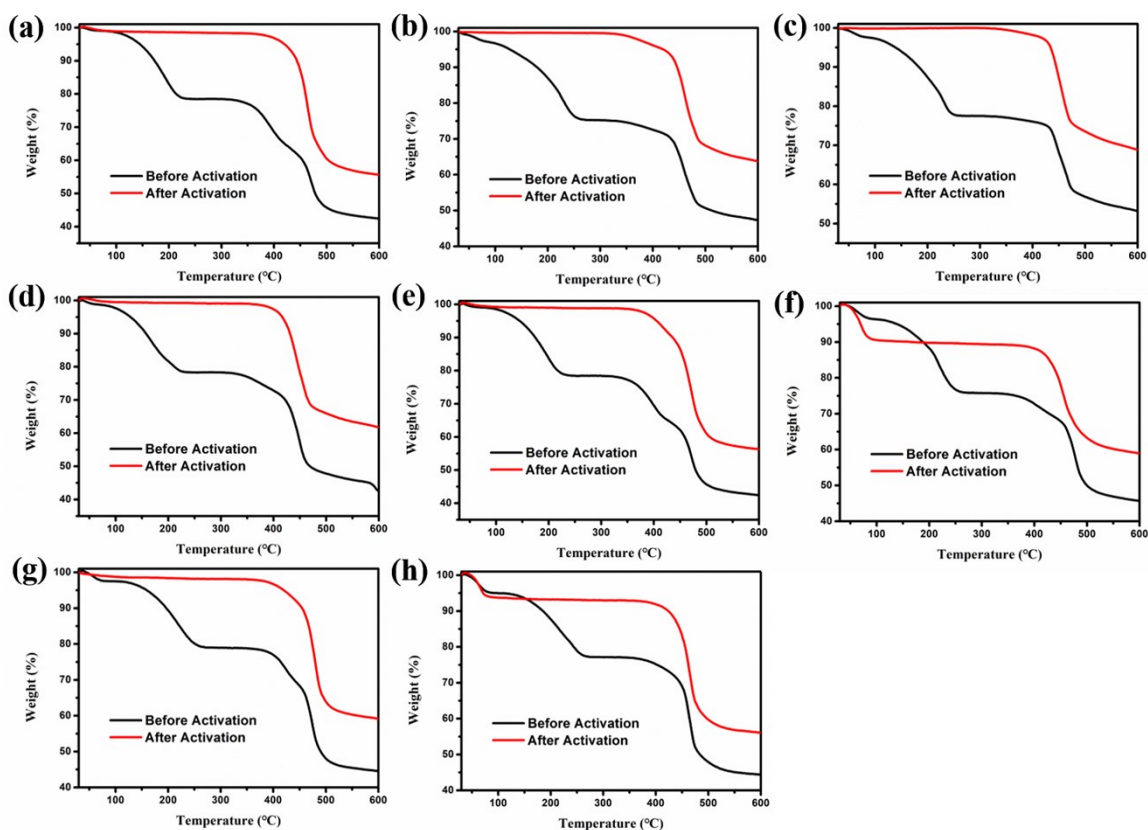

**Figure S3.** The TG diagrams of compounds **1** (a), **2** (b), **3** (c), **4** (d), **5** (e), **6** (f), **7** (g), and **8** (h) before and after activation.

**Table S3** The weight loss percentage, weight loss temperature range and thermal destruction temperature of compounds **1 – 8**

|                      | The first weight loss temperature range (°C) | The first weight loss percentage (%) | The second weight loss temperature range (°C) | The second weight loss percentage (%) | Thermal destruction temperature (°C) |
|----------------------|----------------------------------------------|--------------------------------------|-----------------------------------------------|---------------------------------------|--------------------------------------|
| <b>1</b>             | 30 – 238                                     | 21.5                                 | —                                             | —                                     | 321                                  |
| <b>2</b>             | 30 – 272                                     | 24.7                                 | —                                             | —                                     | 340                                  |
| <b>3</b>             | 30 – 78                                      | 2.3                                  | 96 – 261                                      | 19.8                                  | 340                                  |
| <b>4</b>             | 30 – 239                                     | 21.6                                 | —                                             | —                                     | 317                                  |
| <b>5</b>             | 30 – 244                                     | 21.6                                 | —                                             | —                                     | 326                                  |
| <b>6</b>             | 30 – 89                                      | 3.5                                  | 109 – 273                                     | 20.4                                  | 347                                  |
| <b>7</b>             | 30 – 80                                      | 2.4                                  | 115 – 274                                     | 18.4                                  | 360                                  |
| <b>8</b>             | 30 – 91                                      | 5.0                                  | 117 – 275                                     | 17.6                                  | 359                                  |
| <b>1<sup>a</sup></b> | —                                            | —                                    | —                                             | —                                     | 375                                  |
| <b>2<sup>a</sup></b> | —                                            | —                                    | —                                             | —                                     | 340                                  |
| <b>3<sup>a</sup></b> | —                                            | —                                    | —                                             | —                                     | 340                                  |
| <b>4<sup>a</sup></b> | —                                            | —                                    | —                                             | —                                     | 370                                  |
| <b>5<sup>a</sup></b> | —                                            | —                                    | —                                             | —                                     | 360                                  |
| <b>6<sup>a</sup></b> | 30 – 105                                     | 9.6                                  | —                                             | —                                     | 376                                  |
| <b>7<sup>a</sup></b> | —                                            | —                                    | —                                             | —                                     | 370                                  |
| <b>8<sup>a</sup></b> | 30 – 98                                      | 6.2                                  | —                                             | —                                     | 374                                  |

<sup>a</sup>This sample is activated by soaking it in ACN for three days, and then vacuum-drying at 40°C for 2 hours.

## Section S4. Additional information of CO<sub>2</sub> adsorption tests

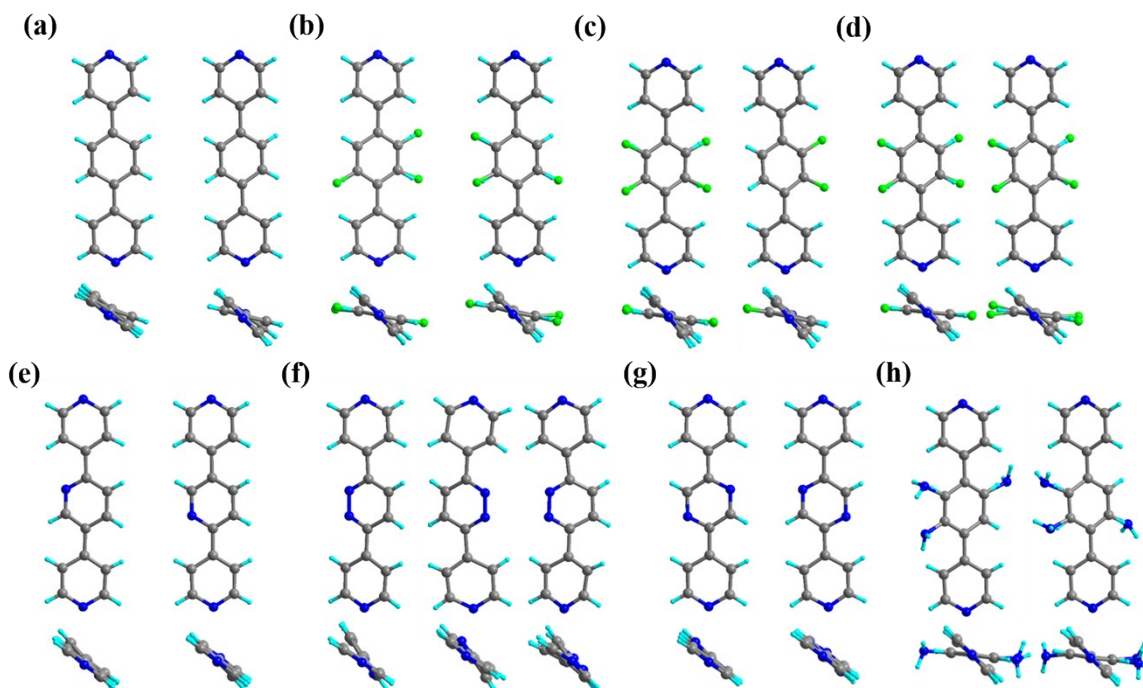

**Figure S4.** The conformations of the pillar-ligands in the single-crystal structures of compound **1** (a), **2** (b), **3** (c), **4** (d), **5** (e), **6** (f), **7** (g), and **8** (h) at 193 K (Gray, C; red, O; blue, N and turquoise H).

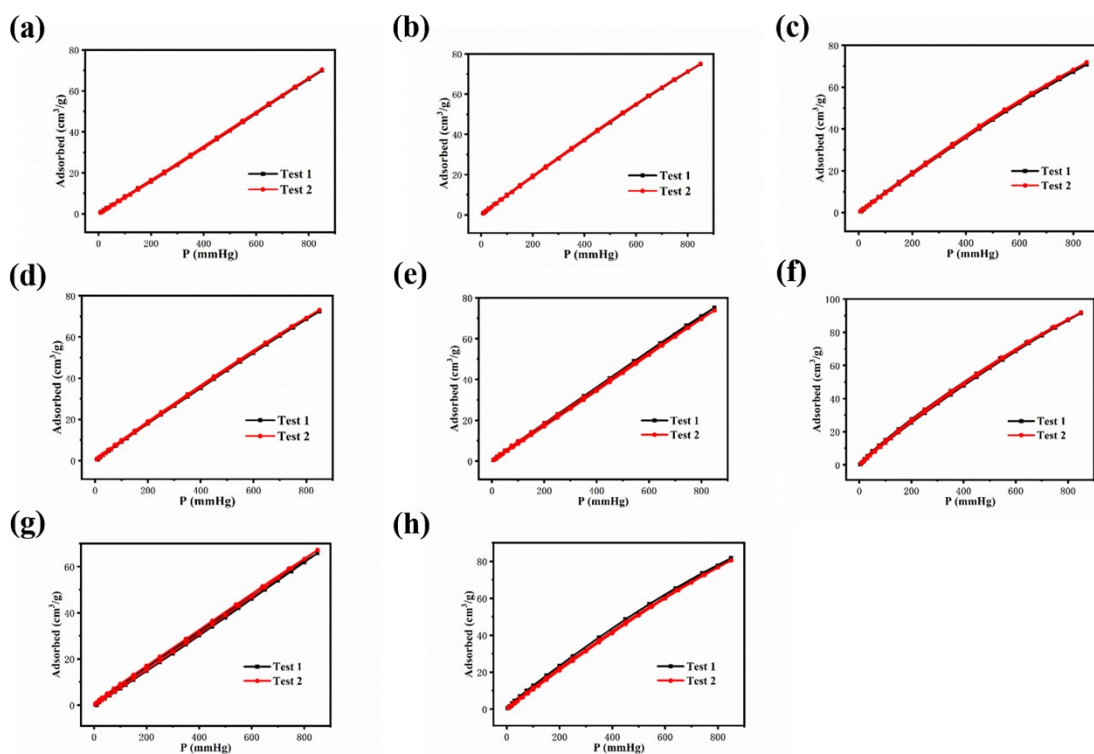

**Figure S5.** Low-pressure CO<sub>2</sub> isotherms of compound **1** (a), **2** (b), **3** (c), **4** (d), **5** (e), **6** (f), **7** (g), and **8** (h) at 273 K.

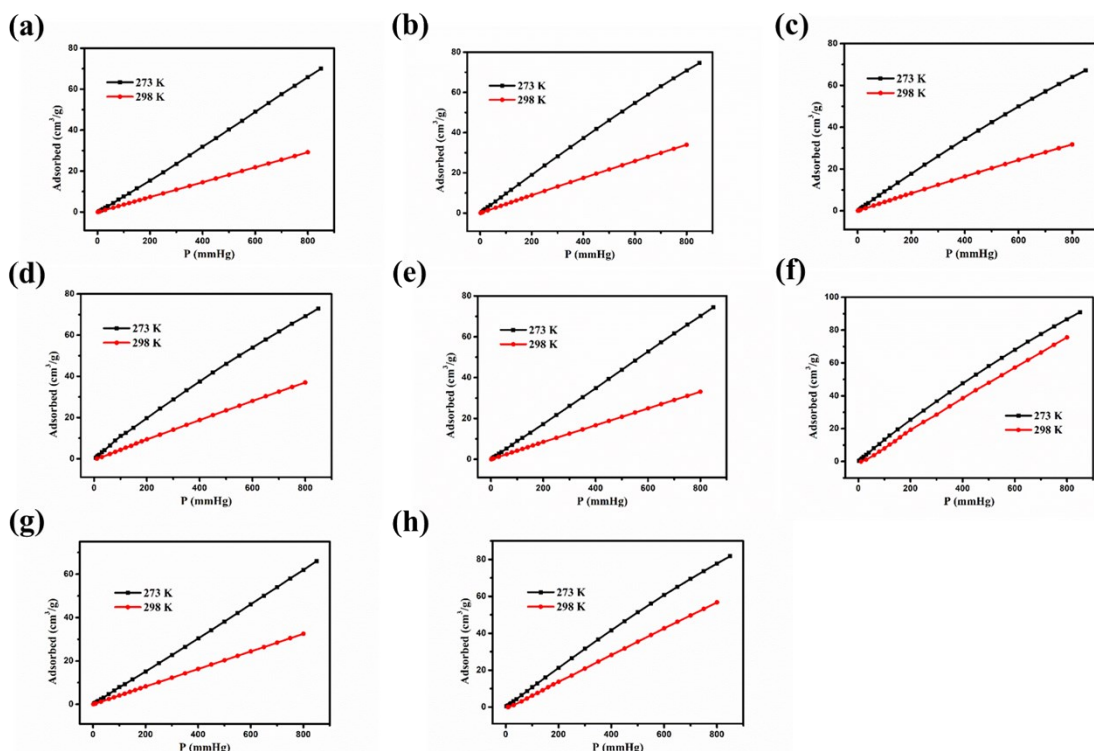

**Figure S6.** Low-pressure CO<sub>2</sub> adsorption isotherms of compound 1 (a), 2 (b), 3 (c), 4 (d), 5 (e), 6 (f), 7 (g), and 8 (h) at 273K and 298 K.

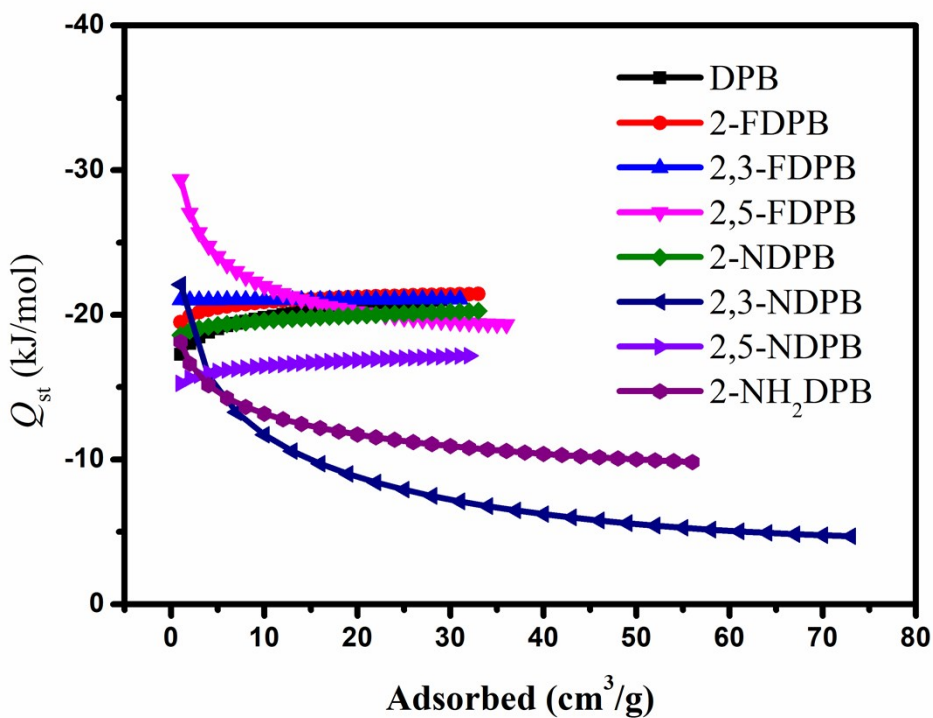

**Figure S7.** The isothermic heats ( $Q_{st}$ ) of CO<sub>2</sub> adsorption which are calculated from the CO<sub>2</sub> adsorption isotherms at 273K and 298K by using the Clausius–Clapeyron equation in compounds 1-8.



**Table S4** The parameters and the CO<sub>2</sub> adsorption capacities of compounds **1 – 8** in CO<sub>2</sub> adsorption tests

|          | CO <sub>2</sub> adsorption capacities at 273K and 850 mmHg (cm <sup>3</sup> ·g <sup>-1</sup> ) |        | CO <sub>2</sub> adsorption capacities at 298K and 800 mmHg (cm <sup>3</sup> ·g <sup>-1</sup> ) | $Q_{st}$ (kJ·mmol <sup>-1</sup> ) | Disordered structure | Solvent-accessible volume <sup>a</sup> | Residual solvent (%) | The dihedral angles between the phenyl rings and the pyridyl rings (°) | Active site                |
|----------|------------------------------------------------------------------------------------------------|--------|------------------------------------------------------------------------------------------------|-----------------------------------|----------------------|----------------------------------------|----------------------|------------------------------------------------------------------------|----------------------------|
|          | Test 1                                                                                         | Test 2 |                                                                                                |                                   |                      |                                        |                      |                                                                        |                            |
| <b>1</b> | 70.0                                                                                           | 70.4   | 29.2                                                                                           | -17.3 — -21.0                     | No                   | 39.1%                                  | —                    | 16.19 and 17.75<br>22.16 and 31.72                                     | No                         |
| <b>2</b> | 74.9                                                                                           | 75.2   | 34.0                                                                                           | -19.5 — -21.4                     | Yes                  | 31.2%                                  | —                    | 27.86 and 36.35<br>29.51 and 34.53                                     | No                         |
| <b>3</b> | 70.8                                                                                           | 71.9   | 31.7                                                                                           | -21.0 — -21.1                     | Yes                  | 30.7%                                  | —                    | 30.62 and 41.46<br>31.10 and 37.29                                     | No                         |
| <b>4</b> | 72.5                                                                                           | 73.1   | 37.0                                                                                           | -29.5 — -19.3                     | Yes                  | 29.4%                                  | —                    | 31.67 and 38.84<br>32.13 and 40.18                                     | No                         |
| <b>5</b> | 75.2                                                                                           | 73.8   | 33.1                                                                                           | -18.6 — -20.3                     | No                   | 40.3%                                  | —                    | 7.89 and 10.62<br>9.04 and 12.53                                       | No                         |
| <b>6</b> | 91.6                                                                                           | 92.0   | 75.6                                                                                           | -22.1 — -4.7                      | Yes                  | 31.9%                                  | 9.6%                 | 3.30 and 22.37<br>13.28 and 23.49<br>18.44 and 19.90                   | No                         |
| <b>7</b> | 65.9                                                                                           | 67.2   | 32.5                                                                                           | -15.3 — -17.2                     | No                   | 39.8%                                  | —                    | 4.74 and 7.48<br>5.15 and 5.77                                         | No                         |
| <b>8</b> | 81.7                                                                                           | 80.5   | 56.8                                                                                           | -18.1 — -9.8                      | Yes                  | 30.0%                                  | 6.2%                 | 33.66 and 40.67<br>33.99 and 40.14                                     | Yes<br>(-NH <sub>2</sub> ) |

<sup>a</sup>This is calculated by the SOLV program of PLATON.

**Table S5** Adsorption capacities of different MOFs for CO<sub>2</sub>.

| MOFs                     | Pressure (mmHg) | Temperature (K) | Capacity (mmol·g <sup>-1</sup> ) | Ref.      |
|--------------------------|-----------------|-----------------|----------------------------------|-----------|
| HKUST-1                  | 760             | 298             | 4.1                              | 1         |
| IRMOF-11                 | 836             | 298             | 1.8                              |           |
| MOF-2                    | 760             | 298             | 0.6                              |           |
| MOF-505                  | 836             | 298             | 3.3                              |           |
| Mg-MOF-74                | 760             | 296             | 8.0                              | 2         |
| Zn-MOF-74                | 760             | 296             | 5.5                              |           |
| Ni-MOF-74                | 760             | 296             | 5.8                              |           |
| Co-MOF-74                | 760             | 296             | 7.0                              |           |
| Mg <sub>2</sub> (dobpdc) | 760             | 298             | 6.4                              | 3         |
| NH <sub>2</sub> -MIL-125 | 760             | 273             | 4.0                              | 4         |
| TMOF-1                   | 760             | 200             | 6.8                              | 5         |
|                          |                 | 273             | 2.2                              |           |
|                          |                 | 298             | 1.4                              |           |
|                          |                 | 308             | 1.2                              |           |
| MAF-23                   | 760             | 273             | 4.1                              | 6         |
|                          |                 | 298             | 2.7                              |           |
| USTC-253                 | 760             | 273             | 3.7                              | 7         |
|                          |                 | 298             | 2.1                              |           |
| USTC-253-TFA             | 760             | 273             | 6.1                              |           |
|                          |                 | 298             | 2.9                              |           |
| LIFM-29                  | 760             | 273             | 2.5                              | 8         |
| LIFM-30                  |                 |                 | 2.6                              |           |
| LIFM-31                  |                 |                 | 2.6                              |           |
| LIFM-32                  |                 |                 | 2.7                              |           |
| LIFM-33                  |                 |                 | 3.6                              |           |
| ZIF-20                   | 760             | 273             | 3.1                              | 9         |
| Compound 1               | 850             | 273             | 3.5                              | This work |
|                          | 800             | 298             | 1.5                              |           |
| Compound 2               | 850             | 273             | 3.7                              |           |
|                          | 800             | 298             | 1.7                              |           |
| Compound 3               | 850             | 273             | 3.6                              |           |
|                          | 800             | 298             | 1.6                              |           |
| Compound 4               | 850             | 273             | 3.6                              |           |
|                          | 800             | 298             | 1.9                              |           |
| Compound 5               | 850             | 273             | 3.7                              |           |
|                          | 800             | 298             | 1.7                              |           |
| Compound 6               | 850             | 273             | 4.6                              |           |
|                          | 800             | 298             | 3.8                              |           |
| Compound 7               | 850             | 273             | 3.3                              |           |
|                          | 800             | 298             | 1.6                              |           |
| Compound 8               | 850             | 273             | 4.0                              |           |
|                          | 800             | 298             | 2.9                              |           |

## References

1. A. R. Millward, and Omar M. Yaghi, *J. Am. Chem. Soc.*, 2005, **127**, 17998.
2. S. R. Caskey, A. G. Wong-Foy, and A. J. Matzger, *J. Am. Chem. Soc.*, 2008, **130**, 10870.
3. T. M. McDonald, W. R. Lee, J. A. Mason, B. M. Wiers, C. S. Hong, and J. R. Long, *J. Am. Chem. Soc.*, 2012, **134**, 7056.
4. S.-N. Kim, J. Kim, H.-Y. Kim, H.-Y. Cho, and W.-S. Ahn, *Catal. Today*, 2013, **204**, 85.
5. G. Zhang, G. Wei, Z. Liu, S. R. J. Oliver, and H. Fei, *Chem. Mater.*, 2016, **28**, 6276.
6. P. Q. Liao, D. D. Zhou, A. X. Zhu, L. Jiang, R. B. Lin, J. P. Zhang, and X. M. Chen, *J. Am. Chem. Soc.*, 2012, **134**, 17380.
7. Z.-R. Jiang, H. Wang, Y. Hu, J. Lu, and H.-L. Jiang, *ChemSusChem*, 2015, **8**, 878.
8. C.-X. Chen, Z. Wei, J.-J. Jiang, Y.-Z. Fan, S.-P. Zheng, C.-C. Cao, Y.-H. Li, D. Fenske, and C.-Y. Su, *Angew. Chem. Int. Ed.*, 2016, **55**, 9932.
9. H. Hayashi, A. Côté, H. Furukawa, M. O’Keeffe, and O. M. Yaghi, *Nat. Mater.*, 2007, **69**, 501.
